# Supplementary material
Source: publisher figshare collection journal article supplement (https://frontiersin.figshare.com/ndownloader/files/14765549)
Supplement: Supplementary file [file 14765549]

Tab. S1 Overview of sampling sites, sorted by water depth, and respective environmental parameter.

| Site               | Expedition             | Year of sampling | Water depth [mbsl] | Reference          | Site name | Specification       | Longitude    | Latitude      | Sediment depth | TOC content [%] | Sulfate [mM] | Sulfide [μM] | Fe <sup>2+</sup> [μM] |      |    |
|--------------------|------------------------|------------------|--------------------|--------------------|-----------|---------------------|--------------|---------------|----------------|-----------------|--------------|--------------|-----------------------|------|----|
| Nueces River mouth | Field sampling ca 2009 | 3                |                    | Reese et al., 2014 | 1         | Bay site, April     | 27°50.5440'N | 97°24.6220'W  | 0 - 2 cmbsf    | 0.63            | 30.46        | 0            | 3.61                  |      |    |
|                    |                        |                  |                    |                    |           |                     |              |               | 2 - 4 cmbsf    | 0.4             | 24.87        | 0            | 1.31                  |      |    |
|                    |                        |                  |                    |                    |           |                     |              |               | 4 - 6 cmbsf    | 0.41            | 30.67        | 0            | 0                     |      |    |
|                    |                        |                  |                    |                    |           |                     |              |               | 6 - 8 cmbsf    | 0.53            | 25.82        | 0            | 0                     |      |    |
|                    |                        |                  |                    |                    |           |                     |              |               | 0 - 2 cmbsf    | 0.54            | 56.65        | 0            | 4.3                   |      |    |
|                    |                        |                  |                    |                    | 3         | Bay site, September | 27°50.5440'N | 97°24.6220'W  | 2 - 4 cmbsf    | 0.45            | 58.23        | 0            | 0                     |      |    |
|                    |                        |                  |                    |                    |           |                     |              |               | 0 - 2 cmbsf    | 0.19            | 16.09        | 0.72         | 1.44                  |      |    |
|                    |                        |                  |                    |                    |           |                     |              |               | 2 - 4 cmbsf    | 0.51            | 18.84        | 132.78       | 0.64                  |      |    |
|                    |                        |                  |                    |                    |           |                     |              |               | 4 - 6 cmbsf    | 0.19            | 11.37        | 22.31        | 0                     |      |    |
|                    |                        |                  |                    |                    |           |                     |              |               | 6 - 8 cmbsf    | 0.29            | 3.44         | 259.86       | 0                     |      |    |
|                    |                        |                  |                    |                    | 3         | River site, April   | 27°51.6250'N | 97°33.3660'W  | 0 - 2 cmbsf    | 1.15            | 2.98         | 139.17       | 4.41                  |      |    |
|                    |                        |                  |                    |                    |           |                     |              |               | 2 - 4 cmbsf    | 1.29            | 3.4          | 142.2        | 2.42                  |      |    |
|                    |                        |                  |                    |                    |           |                     |              |               | 4 - 6 cmbsf    | 0.96            | 1.56         | 156.46       | 3.09                  |      |    |
|                    |                        |                  |                    |                    |           |                     |              |               | 6 - 8 cmbsf    | 0.77            | 2.59         | 166.57       | 2.97                  |      |    |
|                    |                        |                  |                    |                    |           |                     |              |               | 8 - 10 cmbsf   | 1.22            | 4.87         | 184.44       | 0                     |      |    |
| Gulf of Mexico     | MCH11                  | 2008             | 20                 | Reese et al., 2013 | 8C        | 28°59.8560'N        | 92°0.3060'W  | 0 - 2 cmbsf   | 0.3            | 33.23           | 0            | 2.52         |                       |      |    |
|                    |                        |                  |                    |                    |           |                     |              | 2 - 4 cmbsf   | 0.46           | 30.33           | 0            | 1.62         |                       |      |    |
|                    |                        |                  |                    |                    |           |                     |              | 4 - 6 cmbsf   | 0.5            | 32.37           | 0            | 1.26         |                       |      |    |
|                    |                        |                  |                    |                    |           |                     |              | 6 - 8 cmbsf   | 0.57           | 30.33           | 0            | 0            |                       |      |    |
|                    |                        |                  |                    |                    |           |                     |              | 8 - 10 cmbsf  | 0.64           | 28.83           | 0            | 0            |                       |      |    |
|                    |                        |                  |                    |                    |           |                     |              | 10 - 12 cmbsf | 0.49           | 31.51           | 0            | NA           |                       |      |    |
|                    |                        |                  |                    |                    |           |                     |              | 12 - 14 cmbsf | 0.57           | NA              | NA           | NA           |                       |      |    |
|                    |                        |                  |                    |                    |           |                     |              | 0 - 2 cmbsf   | 0.93           | 35.16           | 0            | NA           |                       |      |    |
|                    |                        |                  |                    |                    |           |                     |              | 2 - 4 cmbsf   | 0.93           | 30.01           | 0            | NA           |                       |      |    |
|                    |                        |                  |                    |                    |           |                     |              | 4 - 6 cmbsf   | 0.95           | 28.73           | 0.01         | NA           |                       |      |    |
|                    |                        |                  |                    |                    |           |                     |              | 6 - 8 cmbsf   | 0.89           | 28.73           | 0            | NA           |                       |      |    |
|                    |                        |                  |                    |                    |           |                     |              | 8 - 10 cmbsf  | 0.71           | 29.91           | 0            | NA           |                       |      |    |
|                    |                        |                  |                    |                    |           |                     |              | 10 - 12 cmbsf | 0.74           | 29.58           | 0            | NA           |                       |      |    |
|                    |                        |                  |                    |                    |           |                     |              | 12 - 14 cmbsf | 0.73           | 30.12           | 0.37         | NA           |                       |      |    |
|                    |                        |                  |                    |                    |           |                     |              | 14 - 16 cmbsf | 0.63           | 26.05           | 0.02         | NA           |                       |      |    |
| Gulf of Mexico     | MCH12                  | 2008             | 20                 | Reese et al., 2013 | 8C        | 28°59.8560'N        | 92°0.3060'W  | 16 - 18 cmbsf | 0.61           | 28.3            | NA           | NA           |                       |      |    |
|                    |                        |                  |                    |                    |           |                     |              | 0 - 2 cmbsf   | 0.49           | 33.44           | 0            | NA           |                       |      |    |
|                    |                        |                  |                    |                    |           |                     |              | 2 - 4 cmbsf   | 0.45           | 33.34           | 0.06         | NA           |                       |      |    |
|                    |                        |                  |                    |                    |           |                     |              | 4 - 6 cmbsf   | 0.47           | 30.33           | 0            | NA           |                       |      |    |
|                    |                        |                  |                    |                    |           |                     |              | 6 - 8 cmbsf   | 0.44           | 29.42           | 0.03         | NA           |                       |      |    |
|                    |                        |                  |                    |                    |           |                     |              | 8 - 10 cmbsf  | 0.26           | 30.01           | 0            | NA           |                       |      |    |
|                    |                        |                  |                    |                    |           |                     |              | 10 - 12 cmbsf | 0.32           | 27.64           | 0            | NA           |                       |      |    |
|                    |                        |                  |                    |                    |           |                     |              | 12 - 14 cmbsf | 0.47           | 28.19           | 0            | NA           |                       |      |    |
|                    |                        |                  |                    |                    |           |                     |              | 14 - 16 cmbsf | 0.48           | 30.3            | 0            | NA           |                       |      |    |
|                    |                        |                  |                    |                    |           |                     |              | 16 - 18 cmbsf | 0.42           | 27.3            | 0            | NA           |                       |      |    |
|                    |                        |                  |                    |                    |           |                     |              | 18 - 20 cmbsf | NA             | 29.16           | 0            | NA           |                       |      |    |
|                    |                        |                  |                    |                    |           |                     |              | BC1           | 28°52.8360'N   | 91°44.2380'W    | 0 - 2 cmbsf  | 0.75         | 30.66                 | 0    | NA |
|                    |                        |                  |                    |                    |           |                     |              |               |                |                 | 2 - 4 cmbsf  | 0.64         | 28.51                 | 0    | NA |
|                    |                        |                  |                    |                    |           |                     |              |               |                |                 | 4 - 6 cmbsf  | 0.57         | 26.8                  | 0.54 | NA |
|                    |                        |                  |                    |                    |           |                     |              |               |                |                 | 6 - 8 cmbsf  | 0.33         | 34.19                 | 1.28 | NA |
| 8 - 10 cmbsf       | 0.44                   | 30.44            | 2.31               | NA                 |           |                     |              |               |                |                 |              |              |                       |      |    |
| BC1                | 28°52.8360'N           | 91°44.2380'W     | 10 - 12 cmbsf      | 0.34               | 30.55     | 0                   | NA           |               |                |                 |              |              |                       |      |    |
|                    |                        |                  | 12 - 14 cmbsf      | 0.78               | 29.8      | 0.21                | NA           |               |                |                 |              |              |                       |      |    |
|                    |                        |                  | 14 - 16 cmbsf      | 0.76               | 28.4      | 0                   | NA           |               |                |                 |              |              |                       |      |    |
|                    |                        |                  | 16 - 18 cmbsf      | 0.61               | 30.44     | 0                   | NA           |               |                |                 |              |              |                       |      |    |
|                    |                        |                  | 18 - 20 cmbsf      | 0.64               | 30.44     | 0                   | NA           |               |                |                 |              |              |                       |      |    |

Continuation of Tab. S1

| Site           | Expedition | Year of sampling | Water depth [mbsl] | Reference   | Site name | Specification | Longitude    | Latitude     | Sediment depth | TOC content [%] | Sulfate [mM] | Sulfide [μM] | Fe <sup>2+</sup> [μM] |
|----------------|------------|------------------|--------------------|-------------|-----------|---------------|--------------|--------------|----------------|-----------------|--------------|--------------|-----------------------|
| Gulf of Mexico | MCH14      | 2009             | 20                 | Reese, 2011 | 8C        | noon          | 29°0.0240'N  | 92°0.2340'W  | 0 - 2 cmbsf    | 0.48            | 31.73        | 0.2          | 17.3                  |
|                |            |                  |                    |             |           |               |              |              | 2 - 4 cmbsf    | 0.7             | 34.04        | 0.5          | 27.07                 |
|                |            |                  |                    |             |           |               |              |              | 4 - 6 cmbsf    | 0.41            | 27.68        | 0.11         | 4.59                  |
|                |            |                  |                    |             |           |               |              |              | 6 - 8 cmbsf    | 0.53            | 24.35        | 0.07         | 0                     |
|                |            |                  |                    |             |           |               |              |              | 8 - 10 cmbsf   | 0.54            | 24.14        | 0            | 0.56                  |
|                |            |                  |                    |             |           |               |              |              | 10 - 12 cmbsf  | 0.55            | 26.35        | 0            | 0.92                  |
|                |            |                  |                    |             |           |               |              |              | 12 - 14 cmbsf  | 0.53            | 26.03        | 0            | 1.88                  |
|                |            |                  |                    |             |           |               |              |              | 14 - 16 cmbsf  | 0.53            | 21.63        | 0            | 0                     |
|                |            |                  |                    |             |           |               |              |              | 16 - 18 cmbsf  | 0.53            | 29.46        | 0            | 0                     |
|                |            |                  |                    |             |           | midnight      |              |              | 0 - 2 cmbsf    | 0.36            | 25.26        | 0            | 9.41                  |
|                |            |                  |                    |             |           |               |              |              | 2 - 4 cmbsf    | 0.26            | 29.41        | 0            | 24.25                 |
|                |            |                  |                    |             |           |               |              |              | 4 - 6 cmbsf    | 0.61            | 24.86        | 0            | 21.74                 |
|                |            |                  |                    |             |           |               |              |              | 6 - 8 cmbsf    | 0.52            | 17.63        | 0            | 1.29                  |
|                |            |                  |                    |             |           |               |              |              | 8 - 10 cmbsf   | 0.55            | 14.41        | 0            | 0                     |
|                |            |                  |                    |             |           |               |              |              | 10 - 12 cmbsf  | 0.55            | 14           | 0            | 0.88                  |
|                |            |                  |                    |             |           |               |              |              | 12 - 14 cmbsf  | 0.52            | 12.56        | 0            | 0                     |
|                |            |                  |                    |             |           |               |              |              | 14 - 16 cmbsf  | 0.57            | 9.69         | 0            | 0                     |
|                |            |                  |                    |             |           |               |              |              | 16 - 18 cmbsf  | 0.54            | 27.77        | 0            | 0                     |
|                |            |                  |                    |             | 10B       | noon          | 28°37.7400'N | 90°33.0780'W | 0 - 2 cmbsf    | 0.24            | 22.7         | 0            | 1.01                  |
|                |            |                  |                    |             |           |               |              |              | 2 - 4 cmbsf    | 0.36            | 26.8         | 0.18         | 12.22                 |
|                |            |                  |                    |             |           |               |              |              | 4 - 6 cmbsf    | 0.37            | 31.31        | 0.18         | 15.13                 |
|                |            |                  |                    |             |           |               |              |              | 6 - 8 cmbsf    | 0.47            | 22.14        | 0.08         | 0.83                  |
|                |            |                  |                    |             |           |               |              |              | 8 - 10 cmbsf   | 0.62            | 19.21        | 0.08         | 0.7                   |
|                |            |                  |                    |             |           |               |              |              | 10 - 12 cmbsf  | 0.35            | 11.32        | 0            | 0.63                  |
|                |            |                  |                    |             |           |               |              |              | 12 - 14 cmbsf  | 0.37            | 14.77        | 0            | 0                     |
|                |            |                  |                    |             |           |               |              |              | 14 - 16 cmbsf  | 0.39            | 18.58        | 0            | 0.71                  |
|                |            |                  |                    |             |           |               |              |              | 16 - 18 cmbsf  | 0.35            | 16.27        | 0            | 0                     |
|                |            |                  |                    |             |           |               |              |              | 18 - 20 cmbsf  | 0.36            | 15.06        | 0            | 0                     |
|                |            |                  |                    |             |           | midnight      |              |              | 0 - 2 cmbsf    | 0.31            | 30.71        | 0            | 6.5                   |
|                |            |                  |                    |             |           |               |              |              | 2 - 4 cmbsf    | 0.24            | 27.84        | 0.14         | 0.78                  |
|                |            |                  |                    |             |           |               |              |              | 4 - 6 cmbsf    | 0.39            | 24.46        | 0            | 12.44                 |
|                |            |                  |                    |             |           |               |              |              | 6 - 8 cmbsf    | 0.48            | 19.57        | 0            | 2.51                  |
|                |            |                  |                    |             |           |               |              |              | 8 - 10 cmbsf   | 0.45            | 23.66        | 0            | 0                     |
|                |            |                  |                    |             |           |               |              |              | 10 - 12 cmbsf  | 0.4             | 27.91        | 0            | 0.76                  |
|                |            |                  |                    |             |           |               |              |              | 12 - 14 cmbsf  | 0.47            | 29.6         | 0            | 0                     |
|                |            |                  |                    |             |           |               |              |              | 14 - 16 cmbsf  | 0.34            | 29.37        | 0            | 0.8                   |
|                |            |                  |                    |             |           |               |              |              | 18 - 20 cmbsf  | NA              | NA           | NA           | NA                    |
|                |            |                  |                    |             | AB5       | noon          | 29°4.8060'N  | 89°56.9580'W | 0 - 2 cmbsf    | 1.5             | 20.39        | 3.12         | 7.99                  |
|                |            |                  |                    |             |           |               |              |              | 2 - 4 cmbsf    | 1.46            | 16.13        | 0.34         | 23.6                  |
|                |            |                  |                    |             |           |               |              |              | 4 - 6 cmbsf    | 1.26            | 24.73        | 0.09         | 9.68                  |
|                |            |                  |                    |             |           |               |              |              | 6 - 8 cmbsf    | 1.09            | 17.83        | 0            | 0                     |
|                |            |                  |                    |             |           |               |              |              | 8 - 10 cmbsf   | 1.37            | 27.24        | 0            | 0                     |
|                |            |                  |                    |             |           |               |              |              | 10 - 12 cmbsf  | 1.42            | 14.81        | 0            | 0                     |
|                |            |                  |                    |             |           |               |              |              | 12 - 14 cmbsf  | 1.39            | 18.01        | 0            | 0                     |
|                |            |                  |                    |             |           |               |              |              | 14 - 16 cmbsf  | 0.86            | 19.54        | 0            | 0                     |
|                |            |                  |                    |             |           |               |              |              | 16 - 18 cmbsf  | 0.58            | 18.61        | 0.57         | 0                     |
|                |            |                  |                    |             |           |               |              |              | 18 - 20 cmbsf  | 0.58            | 28.14        | 0.45         | 0                     |
|                |            |                  |                    |             |           | midnight      |              |              | 0 - 2 cmbsf    | 1.7             | 36.83        | 0.61         | 88.48                 |
|                |            |                  |                    |             |           |               |              |              | 2 - 4 cmbsf    | 1.45            | 14.53        | 0.96         | 109.51                |
|                |            |                  |                    |             |           |               |              |              | 4 - 6 cmbsf    | 1.4             | 23.03        | 1            | 80.73                 |
|                |            |                  |                    |             |           |               |              |              | 6 - 8 cmbsf    | 1.28            | 31.4         | 0.47         | 3.05                  |
|                |            |                  |                    |             |           |               |              |              | 8 - 10 cmbsf   | 1.26            | 27.03        | 0.38         | 0.29                  |
|                |            |                  |                    |             |           |               |              |              | 10 - 12 cmbsf  | 1.38            | 14.54        | 1            | 0                     |
|                |            |                  |                    |             |           |               |              |              | 12 - 14 cmbsf  | 1.26            | 24.88        | 0.64         | 0                     |
|                |            |                  |                    |             |           |               |              |              | 14 - 16 cmbsf  | 1.47            | 32.21        | 0.24         | 0                     |
|                |            |                  |                    |             |           |               |              |              | 16 - 18 cmbsf  | 1.37            | 25.49        | 0.17         | 0                     |
|                |            |                  |                    |             |           |               |              |              | 18 - 20 cmbsf  | 0.87            | 19.96        | 0            | 0                     |

Continuation of Tab. S1

| Site               | Expedition             | Year of sampling | Water depth [mbsl] | Reference          | Site name     | Specification | Longitude    | Latitude      | Sediment depth     | TOC content [%] | Sulfate [mM] | Sulfide [μM] | Fe <sup>2+</sup> [μM] |        |      |      |    |     |
|--------------------|------------------------|------------------|--------------------|--------------------|---------------|---------------|--------------|---------------|--------------------|-----------------|--------------|--------------|-----------------------|--------|------|------|----|-----|
| Gulf of Mexico     | MCH19                  | 2011             | 20                 | Reese, 2011        | 8C            | noon          | 28°59.8560'N | 92°0.3060'W   | 0 - 1 cmbsf        | NA              | NA           | NA           | NA                    |        |      |      |    |     |
|                    |                        |                  |                    |                    |               | midnight      |              |               | 1 - 2 cmbsf        | NA              | NA           | NA           | NA                    |        |      |      |    |     |
|                    |                        |                  |                    |                    | 10B           | noon          | 28°37.7400'N | 90°33.0780'W  | 0 - 1 cmbsf        | NA              | NA           | NA           | NA                    |        |      |      |    |     |
|                    |                        |                  |                    |                    |               | midnight      |              |               | 1 - 2 cmbsf        | NA              | NA           | NA           | NA                    |        |      |      |    |     |
|                    |                        |                  |                    |                    | AB5           | noon          | 29°4.8060'N  | 89°56.9580'W  | 0 - 1 cmbsf        | NA              | NA           | NA           | NA                    |        |      |      |    |     |
|                    |                        |                  |                    |                    |               | midnight      |              |               | 1 - 2 cmbsf        | NA              | NA           | NA           | NA                    |        |      |      |    |     |
|                    | Gulf of Mexico         | MCH21            | 2012               | Reese, 2011        | 8C            | noon          | 28°59.8560'N | 92°0.3060'W   | 0 - 1 cmbsf        | NA              | NA           | NA           | NA                    |        |      |      |    |     |
|                    |                        |                  |                    |                    |               | midnight      |              |               | 1 - 2 cmbsf        | NA              | NA           | NA           | NA                    |        |      |      |    |     |
|                    |                        |                  |                    |                    | 10B           | noon          | 28°37.7400'N | 90°33.0780'W  | 0 - 1 cmbsf        | NA              | NA           | NA           | NA                    |        |      |      |    |     |
|                    |                        |                  |                    |                    |               | midnight      |              |               | 1 - 2 cmbsf        | NA              | NA           | NA           | NA                    |        |      |      |    |     |
|                    |                        |                  |                    |                    | AB5           | noon          | 29°4.8060'N  | 89°56.9580'W  | 0 - 1 cmbsf        | NA              | NA           | NA           | NA                    |        |      |      |    |     |
|                    |                        |                  |                    |                    |               | midnight      |              |               | 1 - 2 cmbsf        | NA              | NA           | NA           | NA                    |        |      |      |    |     |
| Palmyra Atoll      | Field sampling ca 2009 | 50               | Unpublished        | 1                  | East          | 5°52.9033'N   | 162°3.6083'W | 0 - 1 cmbsf   | NA                 | NA              | NA           | NA           |                       |        |      |      |    |     |
|                    |                        |                  |                    |                    | West          | 5°53.2916'N   | 162°5.9783'W | 0 - 1 cmbsf   | NA                 | NA              | NA           | NA           |                       |        |      |      |    |     |
|                    |                        |                  |                    | 2                  | East          | 5°53.2150'N   | 162°3.6950'W | 0 - 1 cmbsf   | NA                 | NA              | NA           | NA           |                       |        |      |      |    |     |
|                    |                        |                  |                    |                    | West          | 5°53.1583'N   | 162°5.2633'W | 0 - 1 cmbsf   | NA                 | NA              | NA           | NA           |                       |        |      |      |    |     |
|                    |                        |                  |                    | 3                  | East          | 5°53.0816'N   | 162°3.7500'W | 0 - 1 cmbsf   | NA                 | NA              | NA           | NA           |                       |        |      |      |    |     |
|                    |                        |                  |                    |                    | West          | 5°52.9667'N   | 162°5.9433'W | 0 - 1 cmbsf   | NA                 | NA              | NA           | NA           |                       |        |      |      |    |     |
|                    |                        |                  |                    | 10                 | Central       | 5°53.1300'N   | 162°4.3717'W | 0 - 1 cmbsf   | NA                 | NA              | NA           | NA           |                       |        |      |      |    |     |
|                    |                        |                  |                    |                    |               | Outer         | 5°52.7000'N  | 162°3.3783'W  | 0 - 1 cmbsf        | NA              | NA           | NA           | NA                    |        |      |      |    |     |
|                    |                        |                  |                    |                    | Inner         | 5°52.7233'N   | 162°3.7350'W | 0 - 1 cmbsf   | NA                 | NA              | NA           | NA           |                       |        |      |      |    |     |
|                    |                        |                  |                    |                    |               |               |              |               |                    |                 |              |              |                       |        |      |      |    |     |
|                    |                        |                  |                    |                    | Nankai Trough | IODP 316      | 2007/2008    | 2627          | Mills et al., 2012 | C0004           | 1H1          | 33°13.0000'N | 136°43.0000'E         | 1 mbsf | 0.46 | 25.3 | NA | 2.5 |
|                    |                        |                  |                    |                    |               |               |              | 3H4           |                    |                 | 20 mbsf      |              |                       | 0.42   | 0.86 | NA   | 0  |     |
| 3100               | 8A                     |                  | 33°12.8229'N       | 136°43.5997'E      |               |               |              | 2.16 mbsf     |                    | 0.7             | 23.86        | NA           | 2.48                  |        |      |      |    |     |
|                    |                        | 7.26 mbsf        |                    |                    |               |               |              | 0.65          |                    | 2.27            | NA           | 1.51         |                       |        |      |      |    |     |
| South Atlantic     | M78/3                  | 2009             | 3687               | Unpublished        | GeoB 13863    |               | 39°18.7000'S | 53°57.1600'W  | 8.43 mbsf          | 0.8             | NA           | NA           | NA                    |        |      |      |    |     |
| Equatorial Pacific | IODP 320               | 2009             | 4200               | Unpublished        | U1332A        |               | 2°30.4690'N  | 117°58.1780'W | 7.55 mbsf          | 0               | 27.6         | NA           | 0                     |        |      |      |    |     |
|                    |                        |                  |                    |                    |               |               |              |               | 26.55 mbsf         | 0.12            | 27.9         | NA           | 0                     |        |      |      |    |     |
| North Pond         | IODP 336               | 2011             | 4500               | Reese et al., 2018 | U1382B        |               | 22°45.0000'N | 46°5.0000'W   | 4.5 mbsf           | NA              | NA           | NA           | NA                    |        |      |      |    |     |
|                    |                        |                  |                    |                    |               |               |              |               | 46.5 mbsf          | NA              | NA           | NA           | NA                    |        |      |      |    |     |
|                    |                        |                  |                    |                    | U1383D        |               | 22°48.0000'N | 46°3.0000'W   | 8.5 mbsf           | NA              | NA           | NA           | NA                    |        |      |      |    |     |
|                    |                        |                  |                    |                    |               |               |              |               | 26.0 mbsf          | NA              | NA           | NA           | NA                    |        |      |      |    |     |
|                    |                        |                  |                    |                    |               |               |              |               | 38.5 mbsf          | NA              | NA           | NA           | NA                    |        |      |      |    |     |

Mills, H.J., Reese, B.K., Shepard, A.K., Riedinger, N., Dowd, S.E., Morono, Y., and Inagaki, F. (2012). Characterization of metabolically active bacterial populations in subseafloor Nankai Trough sediments above, within, and below the sulfate-methane transition zone. *Frontiers in Microbiology* 3, 12. doi: 10.3389/fmicb.2012.00113.

Reese, B.K. (2011). Linking molecular microbiology and geochemistry to better understand microbial ecology in coastal marine sediments. *Dissertation at Texas A&M University*.

Reese, B.K., Mills, H.J., Dowd, S.E., and Morse, J.W. (2013). Linking molecular microbial ecology to geochemistry in a coastal hypoxic zone. *Geomicrobiology Journal* 30, 160-172. doi: 10.1080/01490451.2012.659331.

Reese, B.K., Witmer, A.D., Moller, S., Morse, J.W., and Mills, H.J. (2014). Molecular assays advance understanding of sulfate reduction despite cryptic cycles. *Biogeochemistry* 118, 307-319. doi: 10.1007/s10533-013-9933-2.

Reese, B.K., Zinke, L.A., Sobol, M.S., LaRowe, D.E., Orcutt, B.N., Zhang, X., Jaekel, U., Wang, F., Dittmar, T., Defforey, D., Tully, B., Paytan, A., Sylvan, J.B., Amend, J.P., Edwards, K.J., and Girguis, P. (2018). Nitrogen cycling of active bacteria within oligotrophic oligotrophic sediment of the Mid-Atlantic Ridge flank. *Geomicrobiology Journal* 35, 6. doi: 10.1080/01490451.2017.1392649.
